# Supplementary material for: Approaches to nitrogen fixation and recycling in closed life-support systems
Source: Frontiers journal article supplement (doi:10.3389/fspas.2023.1176576), 2023-08-03
Supplement: Data_Sheet_2.xlsx [file Data_Sheet_2.xlsx]

## Sheet: Default
Main Levers						Selected Reactor Volume?:				800	L /Crewmember
Volumetric Scale (%):	100					Shown Reactor Volume:				800	L /Crewmember
Crew Size (x):	10					Break-Even Volume:				279.72	L /Crewmember
Harvest Index (ηH) (%):	50
Digest Efficiencies
Aerobic, A.D. (ηA) (%):	75
Anaerobic, N.D. (ηN) (%):	50
Waste to Feces (Wf) (%):	20
Feces to A.D. (Ww) (%):	50
ICB to A.D. (Wc) (%):	70
Other Levers
N from Reactor (ηB) (%):	80
NF Rate (r) (mg/L D):	13
Reactor N to Crop (ηF) (%):	100
Digest Bioreactor Biomass?	No
Independent Fertilization?	Yes
Urine Recyclability	100
Nitrogen Demand (nD) (g /CM d)	12
True Fertilization:	100	%
																				8.32

## Sheet: Assumptions and Calculations
Loss from B will be dependent on the reactor size. We know that we can only harvest 80%.										Time (d)	-NF -R	+NF -R	-NF +R	+NF +R	R Via NF
										0	#NAME?	0	0	0	0
										1	-0.24	-0.1568	-0.048	0.0352	0.08928
KEY PARAMETERS:										2	-0.48	-0.3136	-0.096	0.0704	0.17856								0	#REF!
										3	-0.72	-0.4704	-0.144	0.1056	0.26784									#REF!
Crew Size (x):	10									4	-0.96	-0.6272	-0.192	0.1408	0.35712									#REF!
% N Wet Biomass*:	0.015									5	-1.2	-0.784	-0.24	0.176	0.4464									#REF!
Demand for N:	12									6	-1.44	-0.9408	-0.288	0.2112	0.53568									#REF!
Production Rate*	13									7	-1.68	-1.0976	-0.336	0.2464	0.62496									#REF!
N storage available (0 for net change):	0									8	-1.92	-1.2544	-0.384	0.2816	0.71424									#REF!
Reactor Capacity:	800									9	-2.16	-1.4112	-0.432	0.3168	0.80352									#REF!
										10	-2.4	-1.568	-0.48	0.352	0.8928									#REF!
Wastewater + Acetate = 1.65x Acetate*	1.65									11	-2.64	-1.7248	-0.528	0.3872	0.98208									#REF!
Agricultural Harvest Index (amount edible)	0.5									12	-2.88	-1.8816	-0.576	0.4224	1.07136									#REF!
Efficiency of Agricultural Integration (N into biomass)	1									13	-3.12	-2.0384	-0.624	0.4576	1.16064									#REF!
Percent of dietary N to waste N	0.2									14	-3.36	-2.1952	-0.672	0.4928	1.24992									#REF!
Anaerobic Digestion Efficiency	0.5									15	-3.6	-2.352	-0.72	0.528	1.3392									#REF!
Aerobic Digestion Efficiency	0.75									16	-3.84	-2.5088	-0.768	0.5632	1.42848									#REF!
Send reactor biomass to the digesters?	0									17	-4.08	-2.6656	-0.816	0.5984	1.51776									#REF!
Harvestable biomass from reactor	0.8									18	-4.32	-2.8224	-0.864	0.6336	1.60704									#REF!
Digestion Net (Weighted Average of An.D and A.D)										19	-4.56	-2.9792	-0.912	0.6688	1.69632									#REF!
		Nets								20	-4.8	-3.136	-0.96	0.704	1.7856									#REF!
Biomass to Aerobic Digestion Conversion Factor	0.7	0.675								21	-5.04	-3.2928	-1.008	0.7392	1.87488									#REF!
Feces to enter aerobic digestion conversion factor	0.5	0.625								22	-5.28	-3.4496	-1.056	0.7744	1.96416									#REF!
Food to Feces Conversion Factor	0.2									23	-5.52	-3.6064	-1.104	0.8096	2.05344									#REF!
										24	-5.76	-3.7632	-1.152	0.8448	2.14272									#REF!
										25	-6	-3.92	-1.2	0.88	2.232									#REF!
										26	-6.24	-4.0768	-1.248	0.9152	2.32128									#REF!
										27	-6.48	-4.2336	-1.296	0.9504	2.41056									#REF!
Recycling Computations:										28	-6.72	-4.3904	-1.344	0.9856	2.49984									#REF!
Urine Recyclability	1									29	-6.96	-4.5472	-1.392	1.0208	2.58912									#REF!
Fertilizer Recyclability	1									30	-7.2	-4.704	-1.44	1.056	2.6784									#REF!
ANAE Recyclability	0									31	-7.44	-4.8608	-1.488	1.0912	2.76768									#REF!
Recalcitration Recyclability:	0									32	-7.68	-5.0176	-1.536	1.1264	2.85696									#REF!
Total Demand:	44.4444									33	-7.92	-5.1744	-1.584	1.1616	2.94624									#REF!
Total Loss:	32.4444	Recyclability:	Losses:							34	-8.16	-5.3312	-1.632	1.1968	3.03552									#REF!
Loss from Feces	2.4	1.5	0.9							35	-8.4	-5.488	-1.68	1.232	3.1248									#REF!
Loss from Urine	9.6	9.6	0							36	-8.64	-5.6448	-1.728	1.2672	3.21408									#REF!
Loss from Harvest	12	8.1	3.9							37	-8.88	-5.8016	-1.776	1.3024	3.30336									#REF!
Loss from Fertilization	0	0	0							38	-9.12	-5.9584	-1.824	1.3376	3.39264									#REF!
Loss from Microbes Entering AE/AN	0	0	0							39	-9.36	-6.1152	-1.872	1.3728	3.48192									#REF!
Loss from Biomass Harvest (Do not include)	8.88889	0	8.88889							40	-9.6	-6.272	-1.92	1.408	3.5712									#REF!
		0.2								41	-9.84	-6.4288	-1.968	1.4432	3.66048									#REF!
Total Loss without Recycling:	24									42	-10.08	-6.5856	-2.016	1.4784	3.74976									#REF!
Total Loss with Recycling:	4.8									43	-10.32	-6.7424	-2.064	1.5136	3.83904									#REF!
Total Recycling Gains:	19.2									44	-10.56	-6.8992	-2.112	1.5488	3.92832									#REF!
										45	-10.8	-7.056	-2.16	1.584	4.0176									#REF!
Needed for H	24									46	-11.04	-7.2128	-2.208	1.6192	4.10688									#REF!
Needed for F	24									47	-11.28	-7.3696	-2.256	1.6544	4.19616									#REF!
Needed for ANAE	24									48	-11.52	-7.5264	-2.304	1.6896	4.28544									#REF!
Needed for B	32.8889									49	-11.76	-7.6832	-2.352	1.7248	4.37472									#REF!
										50	-12	-7.84	-2.4	1.76	4.464									#REF!
										51	-12.24	-7.9968	-2.448	1.7952	4.55328									#REF!
										52	-12.48	-8.1536	-2.496	1.8304	4.64256									#REF!
										53	-12.72	-8.3104	-2.544	1.8656	4.73184									#REF!
										54	-12.96	-8.4672	-2.592	1.9008	4.82112									#REF!
										55	-13.2	-8.624	-2.64	1.936	4.9104									#REF!
										56	-13.44	-8.7808	-2.688	1.9712	4.99968									#REF!
										57	-13.68	-8.9376	-2.736	2.0064	5.08896									#REF!
										58	-13.92	-9.0944	-2.784	2.0416	5.17824									#REF!
										59	-14.16	-9.2512	-2.832	2.0768	5.26752									#REF!
										60	-14.4	-9.408	-2.88	2.112	5.3568									#REF!
										61	-14.64	-9.5648	-2.928	2.1472	5.44608									#REF!
										62	-14.88	-9.7216	-2.976	2.1824	5.53536									#REF!
										63	-15.12	-9.8784	-3.024	2.2176	5.62464									#REF!
										64	-15.36	-10.0352	-3.072	2.2528	5.71392									#REF!
										65	-15.6	-10.192	-3.12	2.288	5.8032									#REF!
										66	-15.84	-10.3488	-3.168	2.3232	5.89248									#REF!
										67	-16.08	-10.5056	-3.216	2.3584	5.98176									#REF!
										68	-16.32	-10.6624	-3.264	2.3936	6.07104									#REF!
										69	-16.56	-10.8192	-3.312	2.4288	6.16032									#REF!
										70	-16.8	-10.976	-3.36	2.464	6.2496									#REF!
										71	-17.04	-11.1328	-3.408	2.4992	6.33888									#REF!
										72	-17.28	-11.2896	-3.456	2.5344	6.42816									#REF!
										73	-17.52	-11.4464	-3.504	2.5696	6.51744									#REF!
										74	-17.76	-11.6032	-3.552	2.6048	6.60672									#REF!
										75	-18	-11.76	-3.6	2.64	6.696									#REF!
										76	-18.24	-11.9168	-3.648	2.6752	6.78528									#REF!
										77	-18.48	-12.0736	-3.696	2.7104	6.87456									#REF!
										78	-18.72	-12.2304	-3.744	2.7456	6.96384									#REF!
										79	-18.96	-12.3872	-3.792	2.7808	7.05312									#REF!
										80	-19.2	-12.544	-3.84	2.816	7.1424									#REF!
										81	-19.44	-12.7008	-3.888	2.8512	7.23168									#REF!
										82	-19.68	-12.8576	-3.936	2.8864	7.32096									#REF!
										83	-19.92	-13.0144	-3.984	2.9216	7.41024									#REF!
										84	-20.16	-13.1712	-4.032	2.9568	7.49952									#REF!
										85	-20.4	-13.328	-4.08	2.992	7.5888									#REF!
										86	-20.64	-13.4848	-4.128	3.0272	7.67808									#REF!
										87	-20.88	-13.6416	-4.176	3.0624	7.76736									#REF!
										88	-21.12	-13.7984	-4.224	3.0976	7.85664									#REF!
										89	-21.36	-13.9552	-4.272	3.1328	7.94592									#REF!
										90	-21.6	-14.112	-4.32	3.168	8.0352									#REF!
										91	-21.84	-14.2688	-4.368	3.2032	8.12448									#REF!
										92	-22.08	-14.4256	-4.416	3.2384	8.21376									#REF!
										93	-22.32	-14.5824	-4.464	3.2736	8.30304									#REF!
										94	-22.56	-14.7392	-4.512	3.3088	8.39232									#REF!
										95	-22.8	-14.896	-4.56	3.344	8.4816									#REF!
										96	-23.04	-15.0528	-4.608	3.3792	8.57088									#REF!
										97	-23.28	-15.2096	-4.656	3.4144	8.66016									#REF!
										98	-23.52	-15.3664	-4.704	3.4496	8.74944									#REF!
										99	-23.76	-15.5232	-4.752	3.4848	8.83872									#REF!
										100	-24	-15.68	-4.8	3.52	8.928									#REF!
										101	-24.24	-15.8368	-4.848	3.5552	9.01728									#REF!
										102	-24.48	-15.9936	-4.896	3.5904	9.10656									#REF!
										103	-24.72	-16.1504	-4.944	3.6256	9.19584									#REF!
										104	-24.96	-16.3072	-4.992	3.6608	9.28512									#REF!
										105	-25.2	-16.464	-5.04	3.696	9.3744									#REF!
										106	-25.44	-16.6208	-5.088	3.7312	9.46368									#REF!
										107	-25.68	-16.7776	-5.136	3.7664	9.55296									#REF!
										108	-25.92	-16.9344	-5.184	3.8016	9.64224									#REF!
										109	-26.16	-17.0912	-5.232	3.8368	9.73152									#REF!
										110	-26.4	-17.248	-5.28	3.872	9.8208									#REF!
										111	-26.64	-17.4048	-5.328	3.9072	9.91008									#REF!
										112	-26.88	-17.5616	-5.376	3.9424	9.99936									#REF!
										113	-27.12	-17.7184	-5.424	3.9776	10.0886									#REF!
										114	-27.36	-17.8752	-5.472	4.0128	10.1779									#REF!
										115	-27.6	-18.032	-5.52	4.048	10.2672									#REF!
										116	-27.84	-18.1888	-5.568	4.0832	10.3565									#REF!
										117	-28.08	-18.3456	-5.616	4.1184	10.4458									#REF!
										118	-28.32	-18.5024	-5.664	4.1536	10.535									#REF!
										119	-28.56	-18.6592	-5.712	4.1888	10.6243									#REF!
										120	-28.8	-18.816	-5.76	4.224	10.7136									#REF!
										121	-29.04	-18.9728	-5.808	4.2592	10.8029									#REF!
										122	-29.28	-19.1296	-5.856	4.2944	10.8922									#REF!
										123	-29.52	-19.2864	-5.904	4.3296	10.9814									#REF!
										124	-29.76	-19.4432	-5.952	4.3648	11.0707									#REF!
										125	-30	-19.6	-6	4.4	11.16									#REF!
										126	-30.24	-19.7568	-6.048	4.4352	11.2493									#REF!
										127	-30.48	-19.9136	-6.096	4.4704	11.3386									#REF!
										128	-30.72	-20.0704	-6.144	4.5056	11.4278									#REF!
										129	-30.96	-20.2272	-6.192	4.5408	11.5171									#REF!
										130	-31.2	-20.384	-6.24	4.576	11.6064									#REF!
										131	-31.44	-20.5408	-6.288	4.6112	11.6957									#REF!
										132	-31.68	-20.6976	-6.336	4.6464	11.785									#REF!
										133	-31.92	-20.8544	-6.384	4.6816	11.8742									#REF!
										134	-32.16	-21.0112	-6.432	4.7168	11.9635									#REF!
										135	-32.4	-21.168	-6.48	4.752	12.0528									#REF!
										136	-32.64	-21.3248	-6.528	4.7872	12.1421									#REF!
										137	-32.88	-21.4816	-6.576	4.8224	12.2314									#REF!
										138	-33.12	-21.6384	-6.624	4.8576	12.3206									#REF!
										139	-33.36	-21.7952	-6.672	4.8928	12.4099									#REF!
										140	-33.6	-21.952	-6.72	4.928	12.4992									#REF!
										141	-33.84	-22.1088	-6.768	4.9632	12.5885									#REF!
										142	-34.08	-22.2656	-6.816	4.9984	12.6778									#REF!
										143	-34.32	-22.4224	-6.864	5.0336	12.767									#REF!
										144	-34.56	-22.5792	-6.912	5.0688	12.8563									#REF!
										145	-34.8	-22.736	-6.96	5.104	12.9456									#REF!
										146	-35.04	-22.8928	-7.008	5.1392	13.0349									#REF!
										147	-35.28	-23.0496	-7.056	5.1744	13.1242									#REF!
										148	-35.52	-23.2064	-7.104	5.2096	13.2134									#REF!
										149	-35.76	-23.3632	-7.152	5.2448	13.3027									#REF!
										150	-36	-23.52	-7.2	5.28	13.392									#REF!
										151	-36.24	-23.6768	-7.248	5.3152	13.4813									#REF!
										152	-36.48	-23.8336	-7.296	5.3504	13.5706									#REF!
										153	-36.72	-23.9904	-7.344	5.3856	13.6598									#REF!
										154	-36.96	-24.1472	-7.392	5.4208	13.7491									#REF!
										155	-37.2	-24.304	-7.44	5.456	13.8384									#REF!
										156	-37.44	-24.4608	-7.488	5.4912	13.9277									#REF!
										157	-37.68	-24.6176	-7.536	5.5264	14.017									#REF!
										158	-37.92	-24.7744	-7.584	5.5616	14.1062									#REF!
										159	-38.16	-24.9312	-7.632	5.5968	14.1955									#REF!
										160	-38.4	-25.088	-7.68	5.632	14.2848									#REF!
										161	-38.64	-25.2448	-7.728	5.6672	14.3741									#REF!
										162	-38.88	-25.4016	-7.776	5.7024	14.4634									#REF!
										163	-39.12	-25.5584	-7.824	5.7376	14.5526									#REF!
										164	-39.36	-25.7152	-7.872	5.7728	14.6419									#REF!
										165	-39.6	-25.872	-7.92	5.808	14.7312									#REF!
										166	-39.84	-26.0288	-7.968	5.8432	14.8205									#REF!
										167	-40.08	-26.1856	-8.016	5.8784	14.9098									#REF!
										168	-40.32	-26.3424	-8.064	5.9136	14.999									#REF!
										169	-40.56	-26.4992	-8.112	5.9488	15.0883									#REF!
										170	-40.8	-26.656	-8.16	5.984	15.1776									#REF!
										171	-41.04	-26.8128	-8.208	6.0192	15.2669									#REF!
										172	-41.28	-26.9696	-8.256	6.0544	15.3562									#REF!
										173	-41.52	-27.1264	-8.304	6.0896	15.4454									#REF!
										174	-41.76	-27.2832	-8.352	6.1248	15.5347									#REF!
										175	-42	-27.44	-8.4	6.16	15.624									#REF!
										176	-42.24	-27.5968	-8.448	6.1952	15.7133									#REF!
										177	-42.48	-27.7536	-8.496	6.2304	15.8026									#REF!
										178	-42.72	-27.9104	-8.544	6.2656	15.8918									#REF!
										179	-42.96	-28.0672	-8.592	6.3008	15.9811									#REF!
										180	-43.2	-28.224	-8.64	6.336	16.0704									#REF!
										181	-43.44	-28.3808	-8.688	6.3712	16.1597									#REF!
										182	-43.68	-28.5376	-8.736	6.4064	16.249									#REF!
										183	-43.92	-28.6944	-8.784	6.4416	16.3382									#REF!
										184	-44.16	-28.8512	-8.832	6.4768	16.4275									#REF!
										185	-44.4	-29.008	-8.88	6.512	16.5168									#REF!
										186	-44.64	-29.1648	-8.928	6.5472	16.6061									#REF!
										187	-44.88	-29.3216	-8.976	6.5824	16.6954									#REF!
										188	-45.12	-29.4784	-9.024	6.6176	16.7846									#REF!
										189	-45.36	-29.6352	-9.072	6.6528	16.8739									#REF!
										190	-45.6	-29.792	-9.12	6.688	16.9632									#REF!
										191	-45.84	-29.9488	-9.168	6.7232	17.0525									#REF!
										192	-46.08	-30.1056	-9.216	6.7584	17.1418									#REF!
										193	-46.32	-30.2624	-9.264	6.7936	17.231									#REF!
										194	-46.56	-30.4192	-9.312	6.8288	17.3203									#REF!
										195	-46.8	-30.576	-9.36	6.864	17.4096									#REF!
										196	-47.04	-30.7328	-9.408	6.8992	17.4989									#REF!
										197	-47.28	-30.8896	-9.456	6.9344	17.5882									#REF!
										198	-47.52	-31.0464	-9.504	6.9696	17.6774									#REF!
										199	-47.76	-31.2032	-9.552	7.0048	17.7667									#REF!
										200	-48	-31.36	-9.6	7.04	17.856									#REF!
										201	-48.24	-31.5168	-9.648	7.0752	17.9453									#REF!
										202	-48.48	-31.6736	-9.696	7.1104	18.0346									#REF!
										203	-48.72	-31.8304	-9.744	7.1456	18.1238									#REF!
										204	-48.96	-31.9872	-9.792	7.1808	18.2131									#REF!
										205	-49.2	-32.144	-9.84	7.216	18.3024									#REF!
										206	-49.44	-32.3008	-9.888	7.2512	18.3917									#REF!
										207	-49.68	-32.4576	-9.936	7.2864	18.481									#REF!
										208	-49.92	-32.6144	-9.984	7.3216	18.5702									#REF!
										209	-50.16	-32.7712	-10.032	7.3568	18.6595									#REF!
										210	-50.4	-32.928	-10.08	7.392	18.7488									#REF!
										211	-50.64	-33.0848	-10.128	7.4272	18.8381									#REF!
										212	-50.88	-33.2416	-10.176	7.4624	18.9274									#REF!
										213	-51.12	-33.3984	-10.224	7.4976	19.0166									#REF!
										214	-51.36	-33.5552	-10.272	7.5328	19.1059									#REF!
										215	-51.6	-33.712	-10.32	7.568	19.1952									#REF!
										216	-51.84	-33.8688	-10.368	7.6032	19.2845									#REF!
										217	-52.08	-34.0256	-10.416	7.6384	19.3738									#REF!
										218	-52.32	-34.1824	-10.464	7.6736	19.463									#REF!
										219	-52.56	-34.3392	-10.512	7.7088	19.5523									#REF!
										220	-52.8	-34.496	-10.56	7.744	19.6416									#REF!
										221	-53.04	-34.6528	-10.608	7.7792	19.7309									#REF!
										222	-53.28	-34.8096	-10.656	7.8144	19.8202									#REF!
										223	-53.52	-34.9664	-10.704	7.8496	19.9094									#REF!
										224	-53.76	-35.1232	-10.752	7.8848	19.9987									#REF!
										225	-54	-35.28	-10.8	7.92	20.088									#REF!
										226	-54.24	-35.4368	-10.848	7.9552	20.1773									#REF!
										227	-54.48	-35.5936	-10.896	7.9904	20.2666									#REF!
										228	-54.72	-35.7504	-10.944	8.0256	20.3558									#REF!
										229	-54.96	-35.9072	-10.992	8.0608	20.4451									#REF!
										230	-55.2	-36.064	-11.04	8.096	20.5344									#REF!
										231	-55.44	-36.2208	-11.088	8.1312	20.6237									#REF!
										232	-55.68	-36.3776	-11.136	8.1664	20.713									#REF!
										233	-55.92	-36.5344	-11.184	8.2016	20.8022									#REF!
										234	-56.16	-36.6912	-11.232	8.2368	20.8915									#REF!
										235	-56.4	-36.848	-11.28	8.272	20.9808									#REF!
										236	-56.64	-37.0048	-11.328	8.3072	21.0701									#REF!
										237	-56.88	-37.1616	-11.376	8.3424	21.1594									#REF!
										238	-57.12	-37.3184	-11.424	8.3776	21.2486									#REF!
										239	-57.36	-37.4752	-11.472	8.4128	21.3379									#REF!
										240	-57.6	-37.632	-11.52	8.448	21.4272									#REF!
										241	-57.84	-37.7888	-11.568	8.4832	21.5165									#REF!
										242	-58.08	-37.9456	-11.616	8.5184	21.6058									#REF!
										243	-58.32	-38.1024	-11.664	8.5536	21.695									#REF!
										244	-58.56	-38.2592	-11.712	8.5888	21.7843									#REF!
										245	-58.8	-38.416	-11.76	8.624	21.8736									#REF!
										246	-59.04	-38.5728	-11.808	8.6592	21.9629									#REF!
										247	-59.28	-38.7296	-11.856	8.6944	22.0522									#REF!
										248	-59.52	-38.8864	-11.904	8.7296	22.1414									#REF!
										249	-59.76	-39.0432	-11.952	8.7648	22.2307									#REF!
										250	-60	-39.2	-12	8.8	22.32									#REF!
										251	-60.24	-39.3568	-12.048	8.8352	22.4093									#REF!
										252	-60.48	-39.5136	-12.096	8.8704	22.4986									#REF!
										253	-60.72	-39.6704	-12.144	8.9056	22.5878									#REF!
										254	-60.96	-39.8272	-12.192	8.9408	22.6771									#REF!
										255	-61.2	-39.984	-12.24	8.976	22.7664									#REF!
										256	-61.44	-40.1408	-12.288	9.0112	22.8557									#REF!
										257	-61.68	-40.2976	-12.336	9.0464	22.945									#REF!
										258	-61.92	-40.4544	-12.384	9.0816	23.0342									#REF!
										259	-62.16	-40.6112	-12.432	9.1168	23.1235									#REF!
										260	-62.4	-40.768	-12.48	9.152	23.2128									#REF!
										261	-62.64	-40.9248	-12.528	9.1872	23.3021									#REF!
										262	-62.88	-41.0816	-12.576	9.2224	23.3914									#REF!
										263	-63.12	-41.2384	-12.624	9.2576	23.4806									#REF!
										264	-63.36	-41.3952	-12.672	9.2928	23.5699									#REF!
										265	-63.6	-41.552	-12.72	9.328	23.6592									#REF!
										266	-63.84	-41.7088	-12.768	9.3632	23.7485									#REF!
										267	-64.08	-41.8656	-12.816	9.3984	23.8378									#REF!
										268	-64.32	-42.0224	-12.864	9.4336	23.927									#REF!
										269	-64.56	-42.1792	-12.912	9.4688	24.0163									#REF!
										270	-64.8	-42.336	-12.96	9.504	24.1056									#REF!
										271	-65.04	-42.4928	-13.008	9.5392	24.1949									#REF!
										272	-65.28	-42.6496	-13.056	9.5744	24.2842									#REF!
										273	-65.52	-42.8064	-13.104	9.6096	24.3734									#REF!
										274	-65.76	-42.9632	-13.152	9.6448	24.4627									#REF!
										275	-66	-43.12	-13.2	9.68	24.552									#REF!
										276	-66.24	-43.2768	-13.248	9.7152	24.6413									#REF!
										277	-66.48	-43.4336	-13.296	9.7504	24.7306									#REF!
										278	-66.72	-43.5904	-13.344	9.7856	24.8198									#REF!
										279	-66.96	-43.7472	-13.392	9.8208	24.9091									#REF!
										280	-67.2	-43.904	-13.44	9.856	24.9984									#REF!
										281	-67.44	-44.0608	-13.488	9.8912	25.0877									#REF!
										282	-67.68	-44.2176	-13.536	9.9264	25.177									#REF!
										283	-67.92	-44.3744	-13.584	9.9616	25.2662									#REF!
										284	-68.16	-44.5312	-13.632	9.9968	25.3555									#REF!
										285	-68.4	-44.688	-13.68	10.032	25.4448									#REF!
										286	-68.64	-44.8448	-13.728	10.0672	25.5341									#REF!
										287	-68.88	-45.0016	-13.776	10.1024	25.6234									#REF!
										288	-69.12	-45.1584	-13.824	10.1376	25.7126									#REF!
										289	-69.36	-45.3152	-13.872	10.1728	25.8019									#REF!
										290	-69.6	-45.472	-13.92	10.208	25.8912									#REF!
										291	-69.84	-45.6288	-13.968	10.2432	25.9805									#REF!
										292	-70.08	-45.7856	-14.016	10.2784	26.0698									#REF!
										293	-70.32	-45.9424	-14.064	10.3136	26.159									#REF!
										294	-70.56	-46.0992	-14.112	10.3488	26.2483									#REF!
										295	-70.8	-46.256	-14.16	10.384	26.3376									#REF!
										296	-71.04	-46.4128	-14.208	10.4192	26.4269									#REF!
										297	-71.28	-46.5696	-14.256	10.4544	26.5162									#REF!
										298	-71.52	-46.7264	-14.304	10.4896	26.6054									#REF!
										299	-71.76	-46.8832	-14.352	10.5248	26.6947									#REF!
										300	-72	-47.04	-14.4	10.56	26.784									#REF!
										301	-72.24	-47.1968	-14.448	10.5952	26.8733									#REF!
										302	-72.48	-47.3536	-14.496	10.6304	26.9626									#REF!
										303	-72.72	-47.5104	-14.544	10.6656	27.0518									#REF!
										304	-72.96	-47.6672	-14.592	10.7008	27.1411									#REF!
										305	-73.2	-47.824	-14.64	10.736	27.2304									#REF!
										306	-73.44	-47.9808	-14.688	10.7712	27.3197									#REF!
										307	-73.68	-48.1376	-14.736	10.8064	27.409									#REF!
										308	-73.92	-48.2944	-14.784	10.8416	27.4982									#REF!
										309	-74.16	-48.4512	-14.832	10.8768	27.5875									#REF!
										310	-74.4	-48.608	-14.88	10.912	27.6768									#REF!
										311	-74.64	-48.7648	-14.928	10.9472	27.7661									#REF!
										312	-74.88	-48.9216	-14.976	10.9824	27.8554									#REF!
										313	-75.12	-49.0784	-15.024	11.0176	27.9446									#REF!
										314	-75.36	-49.2352	-15.072	11.0528	28.0339									#REF!
										315	-75.6	-49.392	-15.12	11.088	28.1232									#REF!
										316	-75.84	-49.5488	-15.168	11.1232	28.2125									#REF!
										317	-76.08	-49.7056	-15.216	11.1584	28.3018									#REF!
										318	-76.32	-49.8624	-15.264	11.1936	28.391									#REF!
										319	-76.56	-50.0192	-15.312	11.2288	28.4803									#REF!
										320	-76.8	-50.176	-15.36	11.264	28.5696									#REF!
										321	-77.04	-50.3328	-15.408	11.2992	28.6589									#REF!
										322	-77.28	-50.4896	-15.456	11.3344	28.7482									#REF!
										323	-77.52	-50.6464	-15.504	11.3696	28.8374									#REF!
										324	-77.76	-50.8032	-15.552	11.4048	28.9267									#REF!
										325	-78	-50.96	-15.6	11.44	29.016									#REF!
										326	-78.24	-51.1168	-15.648	11.4752	29.1053									#REF!
										327	-78.48	-51.2736	-15.696	11.5104	29.1946									#REF!
										328	-78.72	-51.4304	-15.744	11.5456	29.2838									#REF!
										329	-78.96	-51.5872	-15.792	11.5808	29.3731									#REF!
										330	-79.2	-51.744	-15.84	11.616	29.4624									#REF!
										331	-79.44	-51.9008	-15.888	11.6512	29.5517									#REF!
										332	-79.68	-52.0576	-15.936	11.6864	29.641									#REF!
										333	-79.92	-52.2144	-15.984	11.7216	29.7302									#REF!
										334	-80.16	-52.3712	-16.032	11.7568	29.8195									#REF!
										335	-80.4	-52.528	-16.08	11.792	29.9088									#REF!
										336	-80.64	-52.6848	-16.128	11.8272	29.9981									#REF!
										337	-80.88	-52.8416	-16.176	11.8624	30.0874									#REF!
										338	-81.12	-52.9984	-16.224	11.8976	30.1766									#REF!
										339	-81.36	-53.1552	-16.272	11.9328	30.2659									#REF!
										340	-81.6	-53.312	-16.32	11.968	30.3552									#REF!
										341	-81.84	-53.4688	-16.368	12.0032	30.4445									#REF!
										342	-82.08	-53.6256	-16.416	12.0384	30.5338									#REF!
										343	-82.32	-53.7824	-16.464	12.0736	30.623									#REF!
										344	-82.56	-53.9392	-16.512	12.1088	30.7123									#REF!
										345	-82.8	-54.096	-16.56	12.144	30.8016									#REF!
										346	-83.04	-54.2528	-16.608	12.1792	30.8909									#REF!
										347	-83.28	-54.4096	-16.656	12.2144	30.9802									#REF!
										348	-83.52	-54.5664	-16.704	12.2496	31.0694									#REF!
										349	-83.76	-54.7232	-16.752	12.2848	31.1587									#REF!
										350	-84	-54.88	-16.8	12.32	31.248									#REF!
										351	-84.24	-55.0368	-16.848	12.3552	31.3373									#REF!
										352	-84.48	-55.1936	-16.896	12.3904	31.4266									#REF!
										353	-84.72	-55.3504	-16.944	12.4256	31.5158									#REF!
										354	-84.96	-55.5072	-16.992	12.4608	31.6051									#REF!
										355	-85.2	-55.664	-17.04	12.496	31.6944									#REF!
										356	-85.44	-55.8208	-17.088	12.5312	31.7837									#REF!
										357	-85.68	-55.9776	-17.136	12.5664	31.873									#REF!
										358	-85.92	-56.1344	-17.184	12.6016	31.9622									#REF!
										359	-86.16	-56.2912	-17.232	12.6368	32.0515									#REF!
										360	-86.4	-56.448	-17.28	12.672	32.1408									#REF!
										361	-86.64	-56.6048	-17.328	12.7072	32.2301									#REF!
										362	-86.88	-56.7616	-17.376	12.7424	32.3194									#REF!
										363	-87.12	-56.9184	-17.424	12.7776	32.4086									#REF!
										364	-87.36	-57.0752	-17.472	12.8128	32.4979									#REF!
										365	-87.6	-57.232	-17.52	12.848	32.5872									#REF!
										730	-175.2	-114.464	-35.04	25.696	65.1744									#REF!
										1460	-350.4	-228.928	-70.08	51.392	130.349									#REF!
										2920	-700.8	-457.856	-140.16	102.784	260.698									#REF!
										5840	-1401.6	-915.712	-280.32	205.568	521.395									#REF!
										11680	-2803.2	-1831.42	-560.64	411.136	1042.79									#REF!
										23360	-5606.4	-3662.85	-1121.28	822.272	2085.58									#REF!
										46720	-11212.8	-7325.7	-2242.56	1644.54	4171.16									#REF!
										93440	-22425.6	-14651.4	-4485.12	3289.09	8342.32
										186880	-44851.2	-29302.8	-8970.24	6578.18	16684.6
										373760	-89702.4	-58605.6	-17940.5	13156.4	33369.3
										747520	-179405	-117211	-35881	26312.7	66738.6
										1495040	-358810	-234422	-71761.9	52625.4	133477
																						0
